# Supplementary figures and images for: Tuning the surface microstructure and gradient properties of polymers with photopolymerizable polysiloxane-modified nanogels
Source: Royal Society of Chemistry journal article supplement (doi:10.1039/c4ra02176b), 2014-01-01

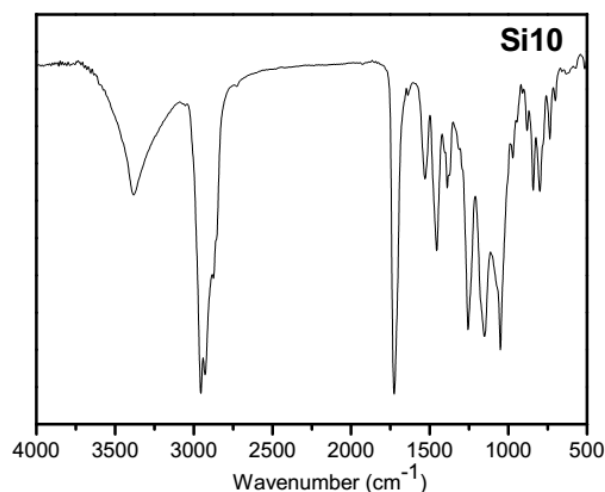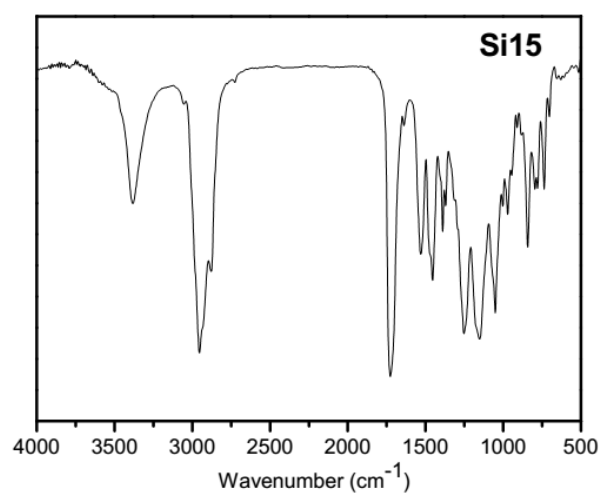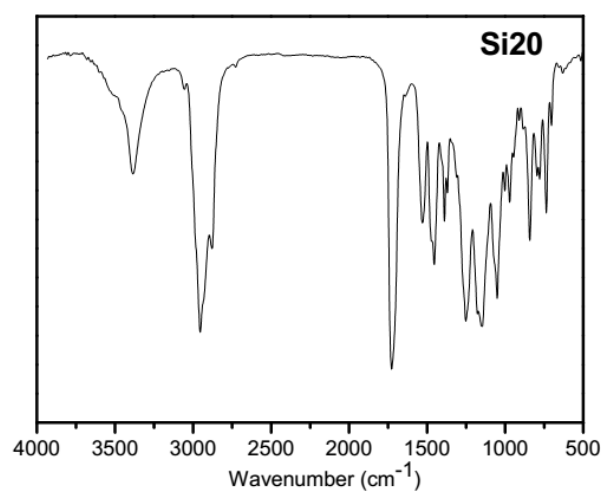

Fig. S1 The FTIR spectra of the nanogels.

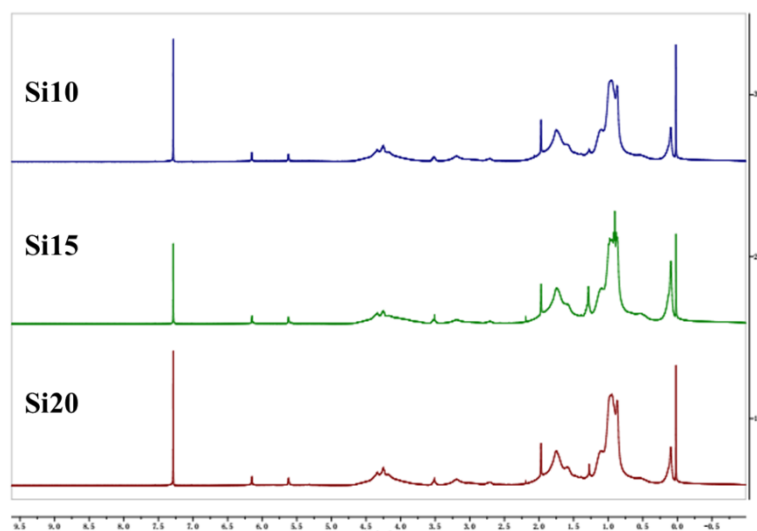

Fig. S2 The  $^1\text{H}$  NMR of the nanogels.

Supplement: c4ra02176b1.pdf [file c4ra02176b1.pdf]
